# Supplementary material
Source: PubMed Central journal article supplement (PMC7448760)
Supplement: NIHMS919924-supplement-3.pdf [file NIHMS919924-supplement-3.pdf]

**Supplementary table 1 Calculation of the ‘c-for-benefit’: an illustration using 6 matched pairs of patients**

| Matched patient pair | Patient assigned to treatment A |                  | Patient assigned to treatment B |                  | Predicted benefit <sup>a</sup> | Observed benefit <sup>b</sup> | Concordant (c) discordant (d) or uninformative (u) with other patient pairs |   |   |   |   |   |   |
|----------------------|---------------------------------|------------------|---------------------------------|------------------|--------------------------------|-------------------------------|-----------------------------------------------------------------------------|---|---|---|---|---|---|
|                      | Predicted benefit               | Observed outcome | Predicted benefit               | Observed outcome |                                |                               | 1                                                                           | 2 | 3 | 4 | 5 | 6 |   |
| 1                    | -0.147                          | 1                | -0.145                          | 1                | -0.146                         | 0                             |                                                                             | d | c | u | c | u |   |
| 2                    | -0.097                          | 0                | -0.101                          | 1                | -0.099                         | -1                            |                                                                             |   |   | c | c | c | c |
| 3                    | -0.063                          | 1                | -0.061                          | 0                | -0.062                         | 1                             |                                                                             |   |   |   | d | u | d |
| 4                    | 0.043                           | 0                | 0.036                           | 0                | 0.040                          | 0                             |                                                                             |   |   |   |   | c | u |
| 5                    | 0.133                           | 1                | 0.128                           | 0                | 0.131                          | 1                             |                                                                             |   |   |   |   |   | d |
| 6                    | 0.306                           | 1                | 0.306                           | 1                | 0.306                          | 0                             |                                                                             |   |   |   |   |   |   |

a. Average predicted benefit within the matched patient pair (average of columns 2 and 4).

b. Observed outcome of patient assigned to treatment A (column 3) minus observed outcome of patient assigned to treatment B (column 5).

Concordance/discordance between predicted and observed benefit is shown between all possible pairs of patient pairs. Pairs of pairs are informative only when they have unequal observed benefit. Calculation of the c-for-benefit is described below.

Patient pair 1 has both lower predicted benefit and lower observed benefit than patient pairs 3 and 5 (concordant). Patient pair 1 has lower predicted benefit but higher observed benefit than patient pair 2 (discordant). Patient pair 1 has equal observed benefit to patient pairs 4 and 6 (uninformative). The total number of concordant pairs of patient pairs is 7 (1-3; 1-5; 2-3; 2-4; 2-5; 2-6; 4-5). The total number of discordant pairs of patient pairs is 4 (1-2; 3-4; 3-6; 5-5). The total number of uninformative pairs of patient pairs is 4 (1-4; 1-6; 3-5; 4-6). The total number of informative (concordant or discordant) pairs of patient pairs is 11. The c-for-benefit in this sample of 6 matched patient pairs is  $7/11 = 0.64$ .

**Supplementary table 2 c-for-benefit (95% confidence interval) based on covariate matched pairs of patients.**

| Measure                    | Constant relative treatment effect | SYNTAX Score II        | Difference              | Original Stroke TPI    | Simplified Stroke TPI  | Difference              |
|----------------------------|------------------------------------|------------------------|-------------------------|------------------------|------------------------|-------------------------|
| <i>Benefit c-statistic</i> |                                    |                        |                         |                        |                        |                         |
| Apparent                   | 0.541<br>(0.487,0.596)             | 0.619<br>(0.563,0.670) | 0.077<br>(0.015,0.155)  | 0.589<br>(0.558,0.618) | 0.601<br>(0.569,0.632) | 0.013<br>(-0.017,0.034) |
| Optimism                   | 0.011                              | 0.034                  | 0.023                   |                        |                        |                         |
| Corrected                  | 0.530<br>(0.476,0.585)             | 0.585<br>(0.530,0.637) | 0.055<br>(-0.008,0.133) |                        |                        |                         |

Correction for optimism in the SYNTAX trial without treatment interactions (“Constant relative treatment effect”) and the SYNTAX Score II was based on internal validation with 1,000 bootstrap samples.
